# Supplementary material
Source: publisher figshare collection journal article supplement (https://gsajournals.figshare.com/ndownloader/files/15009227)
Supplement: Supplementary file 1 [file 15009227]

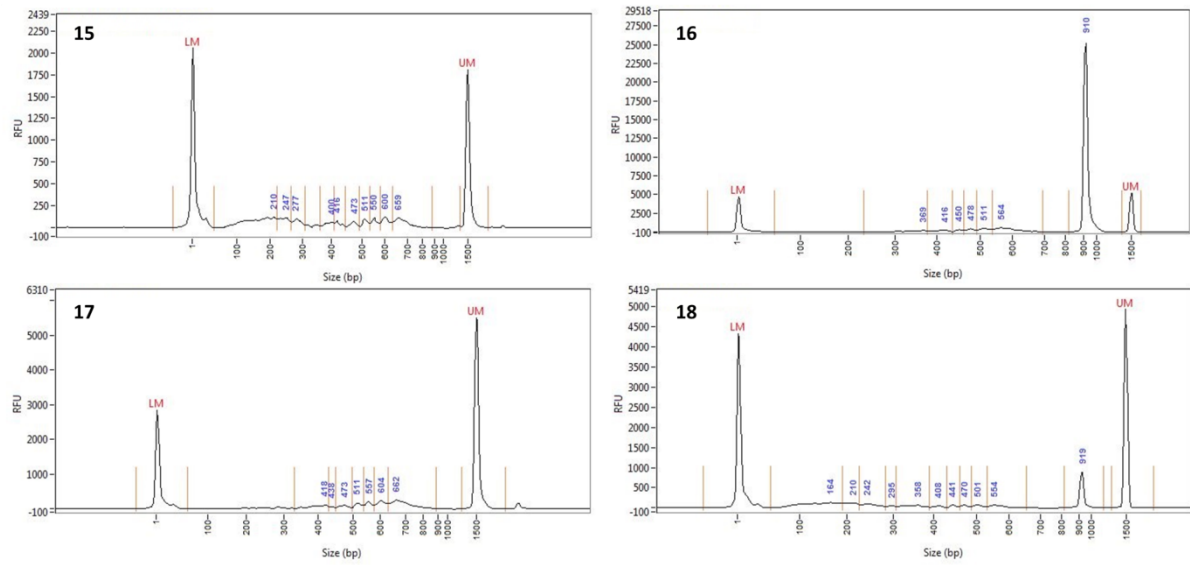

**Figure S3:** FA analysis for all parameters listed in Table S3. The numbers on the panel correspond to the test numbers in the table. FA profiles are as described in Figure S1.
